# Supplementary material for: Conservation agriculture increases soil organic carbon stocks but not soil CO 2 efflux in two 8-year-old experiments in Zimbabwe
Source: Copernicus journal article supplement (doi:10.5194/egusphere-2023-1233), 2023-07-20
Supplement: Supplementary file 1 [file egusphere-2023-1233-supplement.pdf]

## SUPPLEMENTARY MATERIALS

### **Conservation agriculture increases soil organic carbon stocks but not soil CO<sub>2</sub> efflux in two 8-year-old experiments in Zimbabwe**

Armwell Shumba<sup>a,b,c\*</sup>, Regis Chikowo<sup>a,d</sup>, Christian Thierfelder<sup>e</sup>, Marc Corbeels<sup>f,g</sup>, Johan Six<sup>h</sup>, Rémi Cardinael<sup>a,b,f</sup>

<sup>a</sup>Department of Plant Production Sciences and Technologies, University of Zimbabwe, Harare, Zimbabwe

<sup>b</sup>CIRAD, UPR AIDA, Harare, Zimbabwe

<sup>c</sup>Fertilizer, Farm Feeds and Remedies Institute, Department of Research and Specialist Services, Ministry of Lands, Agriculture, Fisheries, Water and Rural Development, Harare, Zimbabwe

<sup>d</sup>Plant, Soil and Microbial Sciences Department, Michigan State University, East Lansing, MI 48824, USA

<sup>e</sup>International Maize and Wheat Improvement Center (CIMMYT), P.O. Box MP 163, Mount Pleasant, Harare, Zimbabwe

<sup>f</sup>AIDA, Univ Montpellier, CIRAD, Montpellier, France

<sup>g</sup>IITA, International Institute of Tropical Agriculture, PO Box 30772, Nairobi, 00100, Kenya

<sup>h</sup>Department of Environmental Systems Science, ETH Zurich, 8092 Zürich, Switzerland

\* Corresponding author. Email: [armwellshumba123@gmail.com](mailto:armwellshumba123@gmail.com)

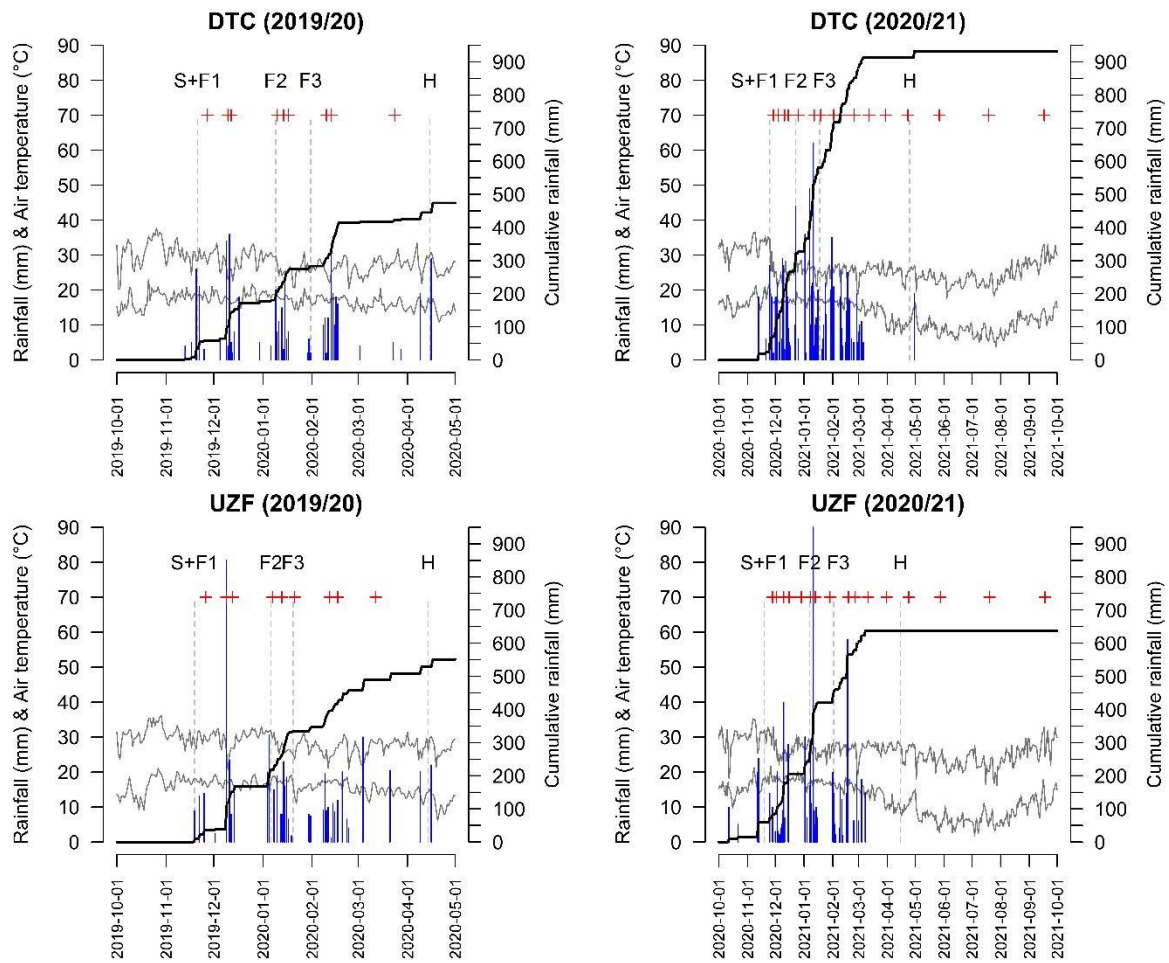

**Figure S1.** Daily and cumulative seasonal rainfall, maximum and minimum air temperature during the 2019/20 and 20/21 seasons at the Domboshava Training Centre (DTC) and University of Zimbabwe farm (UZF) experimental sites. S+F1: sowing + basal fertilizer application, F2: first nitrogen topdressing, F3: second nitrogen topdressing, H: maize harvesting. The red crosses indicate gas sampling dates. The upper and lower grey lines represent the maximum and minimum daily air temperature, respectively.

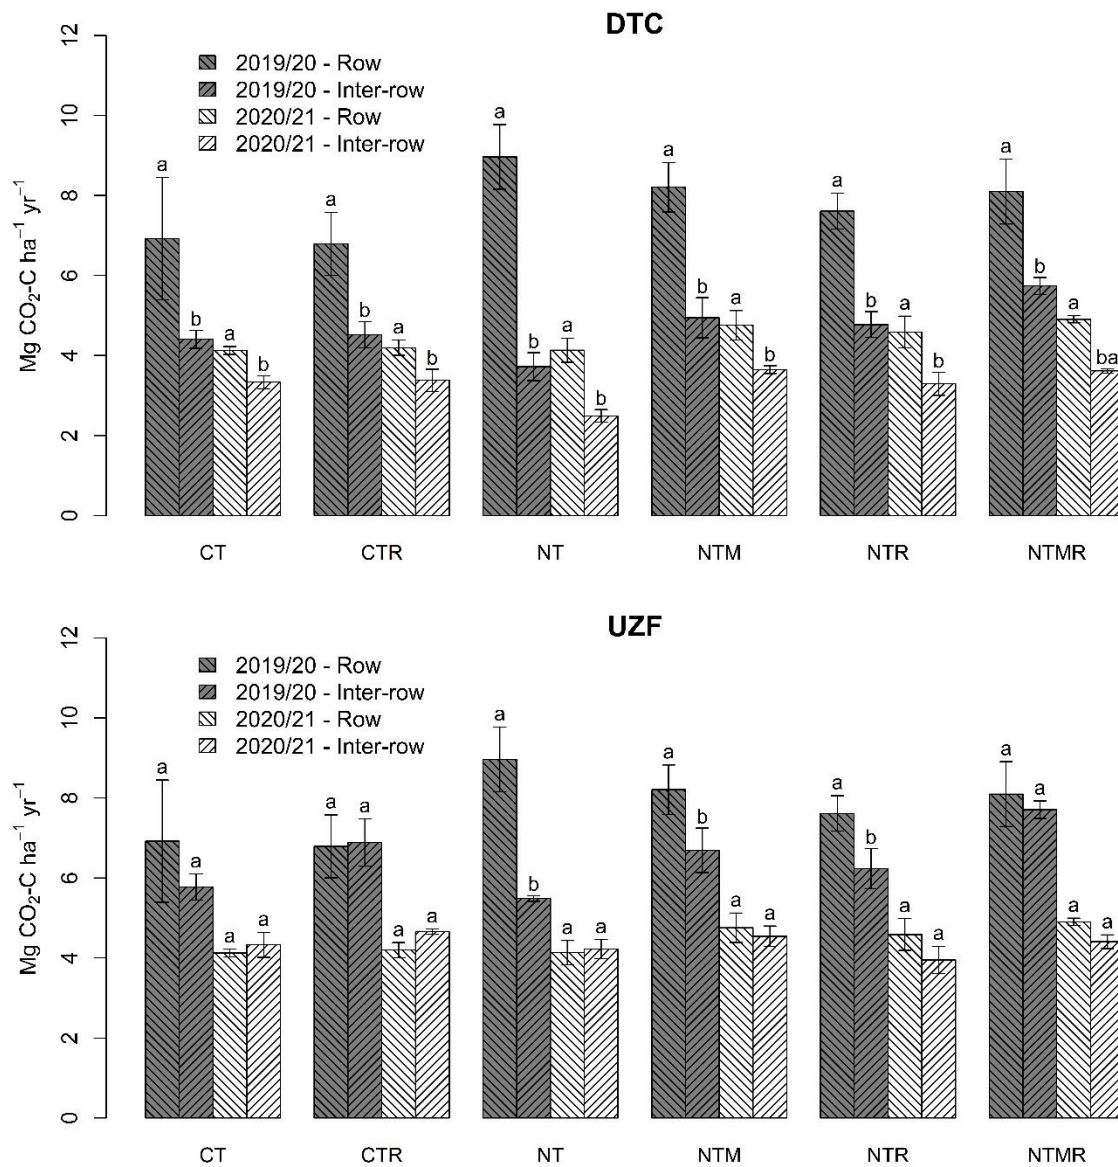

**Figure S2.** Row and inter-row cumulative CO<sub>2</sub>-C emissions for the different treatments in the 2019/20 cropping season, the 2020/21 cropping season, and the whole year (2020/21) at Domboshava Training Centre (DTC) and University of Zimbabwe Farm (UZF). Bars represent standard errors (N = 4). CT: conventional tillage, CTR: conventional tillage with rotation, NT: no-tillage, NTM: no-tillage with mulch, NTR: no-tillage with rotation, NTMR: no-tillage with mulch and rotation.

**Table S1:** Subsoil bulk density ( $\text{g cm}^{-3}$ ) from pits outside the experimental plots at Domboshava Training Centre (DTC) and the University of Zimbabwe (UZF). Associated errors are standard errors ( $N = 4$ ).

| Depth (cm) | Site                |                     |
|------------|---------------------|---------------------|
|            | DTC                 | UZF                 |
| 30-40      | 1.49 ( $\pm 0.01$ ) | 1.47 ( $\pm 0.01$ ) |
| 40-50      | 1.47 ( $\pm 0.01$ ) | 1.49 ( $\pm 0.00$ ) |
| 50-75      | 1.49 ( $\pm 0.01$ ) | 1.48 ( $\pm 0.01$ ) |
| 75-100     | 1.51 ( $\pm 0.01$ ) | 1.48 ( $\pm 0.01$ ) |



**Table S3:** SOC stocks per soil layer at the Domboshava Training Centre (DTC) and University of Zimbabwe Farm (UZF) after 8 years of different tillage, residue and crop management systems. Means in the same row followed by different superscript letters are significantly different and associated errors are standard errors (N = 4). CT: conventional tillage, CTR: conventional tillage with rotation, NT: no-tillage, NTM: no-tillage with mulch, NTR: no-tillage with rotation, NTMR: no-tillage with mulch and rotation.

| Site | ESM<br>(Mg C ha <sup>-1</sup> ) | Approximate<br>soil depth<br>(cm) | SOC stocks (Mg C ha <sup>-1</sup> ) |                          |                          |                         |                          |                          | LSD   | Significance |
|------|---------------------------------|-----------------------------------|-------------------------------------|--------------------------|--------------------------|-------------------------|--------------------------|--------------------------|-------|--------------|
|      |                                 |                                   | CT                                  | CTR                      | NT                       | NTM                     | NTR                      | NTMR                     |       |              |
| DTC  | 650                             | 0-5                               | 3.9 ± 0.73 <sup>c</sup>             | 4.4 ± 0.18 <sup>ab</sup> | 3.8 ± 0.35 <sup>c</sup>  | 5.9 ± 0.60 <sup>a</sup> | 5.3 ± 0.51 <sup>b</sup>  | 5.4 ± 0.34 <sup>b</sup>  | 0.94  | p < 0.001    |
|      | 690                             | 5-10                              | 3.5 ± 0.73 <sup>b</sup>             | 3.9 ± 0.15 <sup>a</sup>  | 3.3 ± 0.20 <sup>b</sup>  | 4.0 ± 0.21 <sup>a</sup> | 4.1 ± 0.28 <sup>a</sup>  | 4.0 ± 0.18 <sup>a</sup>  | 0.45  | p < 0.05     |
|      | 720                             | 10-15                             | 3.3 ± 0.53                          | 3.4 ± 0.22               | 3.1 ± 0.23               | 3.6 ± 0.36              | 3.7 ± 0.23               | 3.5 ± 0.18               | 0.62  | ns           |
|      | 705                             | 15-20                             | 2.9 ± 0.47                          | 3.0 ± 0.21               | 2.8 ± 0.22               | 3.2 ± 0.18              | 3.1 ± 0.23               | 2.9 ± 0.17               | 0.56  | ns           |
|      | 1400                            | 20-30                             | 5.8 ± 1.04                          | 5.7 ± 0.32               | 5.5 ± 0.42               | 5.6 ± 0.25              | 5.8 ± 0.33               | 6.2 ± 0.49               | 1.08  | ns           |
|      | 1430                            | 30-40                             | 5.5 ± 0.16                          | 6.1 ± 0.24               | 5.3 ± 0.33               | 5.2 ± 0.30              | 6.0 ± 0.46               | 4.9 ± 0.40               | 0.93  | ns           |
|      | 1450                            | 40-50                             | 4.7 ± 0.37                          | 4.6 ± 0.11               | 4.4 ± 0.56               | 4.5 ± 0.31              | 4.8 ± 0.26               | 4.8 ± 0.36               | 0.84  | ns           |
|      | 3510                            | 50-75                             | 8.9 ± 0.67                          | 11.4 ± 0.26              | 9.2 ± 1.12               | 7.6 ± 2.35              | 10.0 ± 0.79              | 10.9 ± 1.34              | 1.83  | ns           |
|      | 3215                            | 75-100                            | 8.0 ± 1.08                          | 8.9 ± 0.56               | 7.6 ± 0.81               | 8.0 ± 0.57              | 8.4 ± 0.93               | 8.1 ± 0.81               | 2.09  | ns           |
| UZF  | 460                             | 0-5                               | 8.2 ± 0.15 <sup>cd</sup>            | 8.0 ± 0.14 <sup>c</sup>  | 8.6 ± 0.21 <sup>cd</sup> | 9.6 ± 0.37 <sup>a</sup> | 8.8 ± 0.17 <sup>bc</sup> | 9.2 ± 0.32 <sup>ab</sup> | 0.67  | p < 0.001    |
|      | 410                             | 5-10                              | 7.2 ± 0.17                          | 6.9 ± 0.11               | 7.3 ± 0.15               | 7.7 ± 0.32              | 7.1 ± 0.12               | 7.1 ± 0.22               | 0.58  | ns           |
|      | 460                             | 10-15                             | 7.5 ± 0.16                          | 7.3 ± 0.16               | 7.5 ± 0.28               | 7.8 ± 0.38              | 7.3 ± 0.06               | 7.3 ± 0.37               | 0.73  | ns           |
|      | 510                             | 15-20                             | 7.9 ± 0.25                          | 7.8 ± 0.11               | 7.9 ± 0.09               | 8.2 ± 0.41              | 7.7 ± 0.14               | 7.4 ± 0.20               | 0.62  | ns           |
|      | 930                             | 20-30                             | 11.6 ± 0.63                         | 12.9 ± 0.26              | 12.8 ± 0.36              | 13.1 ± 0.78             | 11.0 ± 0.89              | 12.3 ± 0.90              | 1.98  | ns           |
|      | 1260                            | 30-40                             | 12.8 ± 0.49                         | 15.4 ± 0.96              | 13.1 ± 0.30              | 14.5 ± 1.35             | 14.8 ± 0.45              | 14.2 ± 0.88              | 2.51  | ns           |
|      | 1270                            | 40-50                             | 11.1 ± 0.82                         | 12.2 ± 0.36              | 10.4 ± 0.14              | 12.1 ± 1.25             | 12.1 ± 0.59              | 12.3 ± 0.37              | 2.22  | ns           |
|      | 2890                            | 50-75                             | 23.0 ± 3.13                         | 25.6 ± 2.70              | 22.4 ± 2.57              | 16.8 ± 5.22             | 24.9 ± 5.34              | 28.7 ± 5.99              | 12.91 | ns           |
|      | 2860                            | 75-100                            | 18.5 ± 2.24                         | 23.2 ± 2.83              | 19.9 ± 3.41              | 20.1 ± 1.98             | 22.4 ± 5.01              | 26.5 ± 5.99              | 9.36  | ns           |

**Table S4:** Seasonal organic carbon inputs (Mg C ha<sup>-1</sup>) to soil for different treatments at Domboshava Training Centre (DTC) and the University of Zimbabwe (UZF). Means in the same column followed by different superscript letters are significantly different and associated errors are standard errors (N = 4). CT = conventional tillage, CTR = conventional tillage with rotation, NT = no tillage, NTM = no tillage with mulch, NTR = no tillage with rotation, NTMR = no tillage with mulch and rotation, LSD = least significance difference.

| Site | Treatment    | Seasons                  |                          |                           |                           |                           |                          |                           |                           |
|------|--------------|--------------------------|--------------------------|---------------------------|---------------------------|---------------------------|--------------------------|---------------------------|---------------------------|
|      |              | 2013/14*                 | 2014/15                  | 2015/16*                  | 2016/17                   | 2017/18*                  | 2018/19                  | 2019/20*                  | 2020/21                   |
| DTC  | CT           | 1.42 ± 0.15 <sup>b</sup> | 1.01 ± 0.17 <sup>b</sup> | 1.41 ± 0.05 <sup>b</sup>  | 1.22 ± 0.16 <sup>b</sup>  | 0.67 ± 0.09 <sup>b</sup>  | 0.67 ± 0.19 <sup>b</sup> | 0.51 ± 0.09 <sup>c</sup>  | 0.51 ± 0.11 <sup>b</sup>  |
|      | CRT          | 0.42 ± 0.02 <sup>c</sup> | 1.17 ± 0.09 <sup>b</sup> | 0.23 ± 0.02 <sup>c</sup>  | 1.27 ± 0.12 <sup>b</sup>  | 0.54 ± 0.15 <sup>b</sup>  | 0.74 ± 0.22 <sup>b</sup> | 1.07 ± 0.09 <sup>b</sup>  | 0.50 ± 0.14 <sup>b</sup>  |
|      | NT           | 1.18 ± 0.10 <sup>b</sup> | 1.23 ± 0.23 <sup>b</sup> | 1.22 ± 0.16 <sup>b</sup>  | 1.35 ± 0.19 <sup>b</sup>  | 0.69 ± 0.06 <sup>b</sup>  | 0.61 ± 0.09 <sup>b</sup> | 0.47 ± 0.03 <sup>c</sup>  | 0.49 ± 0.05 <sup>b</sup>  |
|      | NTM          | 2.22 ± 0.07 <sup>a</sup> | 2.25 ± 0.09 <sup>a</sup> | 2.29 ± 0.12 <sup>a</sup>  | 2.27 ± 0.18 <sup>a</sup>  | 1.81 ± 0.07 <sup>a</sup>  | 1.79 ± 0.13 <sup>a</sup> | 1.79 ± 0.10 <sup>a</sup>  | 1.57 ± 0.08 <sup>a</sup>  |
|      | NTR          | 0.51 ± 0.08 <sup>c</sup> | 1.28 ± 0.02 <sup>b</sup> | 0.22 ± 0.04 <sup>c</sup>  | 1.50 ± 0.12 <sup>b</sup>  | 0.52 ± 0.11 <sup>b</sup>  | 0.71 ± 0.13 <sup>b</sup> | 1.25 ± 0.24 <sup>b</sup>  | 0.53 ± 0.10 <sup>b</sup>  |
|      | NTMR         | 0.62 ± 0.02 <sup>c</sup> | 2.23 ± 0.16 <sup>a</sup> | 0.36 ± 0.07 <sup>c</sup>  | 2.02 ± 0.09 <sup>a</sup>  | 0.45 ± 0.12 <sup>b</sup>  | 2.04 ± 0.14 <sup>a</sup> | 1.76 ± 0.14 <sup>a</sup>  | 1.45 ± 0.01 <sup>a</sup>  |
|      | LSD          | 0.27                     | 0.38                     | 0.24                      | 0.46                      | 0.33                      | 0.51                     | 0.38                      | 0.27                      |
|      | Significance | p < 0.001                | p < 0.001                | p < 0.001                 | p < 0.001                 | p < 0.001                 | p < 0.001                | p < 0.001                 | p < 0.001                 |
| UZF  | CT           | 0.77 ± 0.09 <sup>b</sup> | 0.94 ± 0.11 <sup>b</sup> | 1.25 ± 0.13 <sup>b</sup>  | 1.18 ± 0.05 <sup>c</sup>  | 0.99 ± 0.11 <sup>b</sup>  | 0.64 ± 0.05 <sup>c</sup> | 0.40 ± 0.07 <sup>bc</sup> | 1.02 ± 0.06 <sup>cd</sup> |
|      | CRT          | 0.64 ± 0.07 <sup>b</sup> | 1.06 ± 0.13 <sup>b</sup> | 1.77 ± 0.31 <sup>ab</sup> | 1.57 ± 0.06 <sup>cd</sup> | 0.73 ± 0.15 <sup>bc</sup> | 0.80 ± 0.03 <sup>b</sup> | 0.32 ± 0.05 <sup>cd</sup> | 1.20 ± 0.01 <sup>c</sup>  |
|      | NT           | 0.74 ± 0.07 <sup>b</sup> | 1.08 ± 0.09 <sup>b</sup> | 1.36 ± 0.05 <sup>b</sup>  | 1.36 ± 0.13 <sup>ed</sup> | 0.78 ± 0.02 <sup>b</sup>  | 0.71 ± 0.05 <sup>c</sup> | 0.50 ± 0.08 <sup>b</sup>  | 0.84 ± 0.02 <sup>d</sup>  |
|      | NTM          | 1.65 ± 0.04 <sup>a</sup> | 2.10 ± 0.19 <sup>a</sup> | 2.57 ± 0.08 <sup>a</sup>  | 2.10 ± 0.11 <sup>b</sup>  | 2.02 ± 0.01 <sup>a</sup>  | 1.98 ± 0.04 <sup>a</sup> | 1.70 ± 0.05 <sup>a</sup>  | 2.05 ± 0.08 <sup>b</sup>  |
|      | NTR          | 0.66 ± 0.13 <sup>b</sup> | 0.97 ± 0.13 <sup>b</sup> | 2.17 ± 0.70 <sup>ab</sup> | 1.74 ± 0.03 <sup>c</sup>  | 0.60 ± 0.09 <sup>b</sup>  | 0.78 ± 0.04 <sup>b</sup> | 0.22 ± 0.02 <sup>d</sup>  | 1.07 ± 0.11 <sup>c</sup>  |
|      | NTMR         | 0.70 ± 0.05 <sup>b</sup> | 2.01 ± 0.15 <sup>a</sup> | 1.91 ± 0.41 <sup>ab</sup> | 2.71 ± 0.07 <sup>a</sup>  | 0.93 ± 0.11 <sup>a</sup>  | 2.02 ± 0.04 <sup>a</sup> | 0.31 ± 0.07 <sup>cd</sup> | 2.28 ± 0.07 <sup>a</sup>  |
|      | LSD          | 0.46                     | 0.37                     | 1.16                      | 0.26                      | 0.31                      | 0.14                     | 0.12                      | 0.20                      |
|      | Significance | p < 0.001                | p < 0.001                | p < 0.001                 | p < 0.001                 | p < 0.001                 | p < 0.001                | p < 0.001                 | p < 0.001                 |

\*Season when cowpea in rotation treatments was grown after maize was grown in the previous season.
