# Supplementary material for: Conservation agriculture increases soil organic carbon stocks but not soil CO 2 efflux in two 8-year-old experiments in Zimbabwe
Source: Copernicus journal article supplement (doi:10.5194/egusphere-2023-1233), 2023-07-20
Supplement: Supplementary file [file egusphere-2023-1233-AC1-supplement.pdf]

RC1

The paper is very well written, the trial is comprehensive, and methods were explained in detail. The high level of detail in the data presented is a rare find, and valuable insight in the understanding around SOC dynamics in CA systems. I was unable to find any problems in the manuscript, as far as I can tell the trial layout, sampling and analysis are correct, and the manuscript is written in clear language, that convey the message effectively.

We thank the Reviewer for sparing some time to review our manuscript and many thanks for the overall positive and encouraging comment!
